# Supplementary material
Source: publisher figshare collection journal article supplement (https://geolsoc.figshare.com/ndownloader/files/14296820)
Supplement: Supplementary file 1 [file 14296820]

## Sheet: Supplementary Data Table 2
LA–ICP–MS U–Pb monazite analyses from a cd-and-st schist (53815) from the Fisher Massif
Spot	Spot		Isotopic ratios										Ages (Ma)
	Size (µm)		207Pb/235U	2σ	206Pb/238U	2σ	207Pb/206Pb	2σ	206Pb/204Pb	2σ	rho		207Pb/235U	2σ	206Pb/238U	2σ	207Pb/206Pb	2σ	Concordance (%)
15_1	13		0.655	0.015	0.0828	0.0018	0.0573	0.0014	17600	6100	0.3193		511.2	9.2	512.8	11	492	54	100
15_2	13		0.657	0.02	0.0828	0.0022	0.0574	0.0014	10200	5500	0.67115		512	12	512.6	13	497	53	100
15_3	13		0.66	0.021	0.083	0.0022	0.0573	0.0016	12700	6900	0.52379		514	13	514.2	13	493	63	100
15_4	13		0.69	0.029	0.0837	0.0024	0.0591	0.0019	4800	4500	0.65303		532	17	518	14	560	66	97
15_5	13		0.67	0.03	0.0826	0.0026	0.0584	0.0021	5000	4500	0.57816		519	18	512	15	527	86	99
15_6	13		0.65	0.013	0.0821	0.0019	0.0575	0.0012	9100	3600	0.41866		507.6	8.2	508.8	12	500	47	100
15_7	13		0.638	0.016	0.0809	0.002	0.0569	0.0016	10000	4000	0.1209		500.5	9.7	501.7	12	475	64	100
15_8	13		0.657	0.021	0.0811	0.002	0.0583	0.0019	4400	2300	0.15459		512	13	502.8	12	525	72	98
15_9	13		0.638	0.029	0.0802	0.0023	0.0576	0.0024	3200	1000	0.36802		498	18	497	14	474	94	100
15_10	13		0.641	0.034	0.0828	0.0024	0.0558	0.0027	3400	3100	0.35081		501	21	513	14	420	110	102
15_11	13		0.697	0.035	0.0838	0.0042	0.0608	0.0031	1400	2300	0.42821		536	21	518	25	620	110	97
15_12	9		0.629	0.02	0.0814	0.0021	0.0582	0.0025	4900	1900	0.14157		495	13	504	12	508	97	102
15_13	9		0.6	0.029	0.084	0.003	0.055	0.0037	2000	1700	0.1591		477	19	520	18	380	150	109
15_14	9		0.689	0.053	0.0847	0.0035	0.0581	0.0053	770	360	0.010695		524	32	523	21	520	180	100
15_15	9		0.703	0.043	0.0808	0.0023	0.0619	0.0042	1000	430	0.13333		537	26	501	14	610	150	93
15_16	9		0.634	0.022	0.0826	0.0014	0.0552	0.002	5200	2200	0.11098		497	14	511.3	8.3	401	90	103
15_17	9		0.634	0.037	0.0799	0.002	0.059	0.0037	4100	1700	0.069059		495	23	495	12	500	140	100
15_18	9		0.639	0.035	0.0825	0.0025	0.0597	0.0028	4700	3200	0.1555		506	19	511	15	570	110	101
15_19	9		1.33	0.12	0.0965	0.0031	0.1049	0.0083	3100	1900	0.68901		857	57	594	18	1630	160	69
LA–ICP–MS U–Pb monazite analyses from a g-st schist (53816) from the Fisher Massif
16_1	13		0.698	0.032	0.0841	0.003	0.0597	0.0022	6200	4800	0.42316		536	19	520	18	596	89	97
16_2	13		0.657	0.024	0.0836	0.0022	0.0571	0.0022	5700	3300	0.23442		512	15	517.4	13	475	86	101
16_3	13		0.686	0.019	0.0831	0.0019	0.0599	0.0015	7000	3100	0.50069		529	11	514.8	11	586	55	97
16_4	13		0.653	0.015	0.08137	0.0018	0.0584	0.0014	8000	3300	0.17485		509.7	9.2	505.3	10	551	54	99
16_5	13		0.653	0.022	0.0811	0.0022	0.0582	0.0017	8300	5100	0.54751		510	13	502.7	13	526	63	99
16_6	13		0.673	0.024	0.0822	0.0021	0.0593	0.0022	9800	5700	0.15311		522	14	509	12	558	79	98
16_7	13		0.659	0.017	0.08199	0.0018	0.0583	0.0015	11300	4500	0.4072		513	10	508	11	526	55	99
16_8	13		0.658	0.013	0.0832	0.0019	0.0578	0.0012	14400	5200	0.43158		512.9	8.1	514.9	11	509	47	100
16_9	13		0.682	0.028	0.0816	0.002	0.0602	0.0027	6600	3500	0.034394		526	17	505.9	12	581	96	96
16_10	13		0.66	0.016	0.0816	0.0021	0.0585	0.0013	10700	5300	0.54639		514	10	505.6	13	541	50	98
16_11	13		0.683	0.021	0.0828	0.0024	0.0597	0.0019	9700	5100	0.2643		528	13	513	14	579	69	97
16_12	13		0.692	0.035	0.0856	0.0028	0.0588	0.0032	43000	30000	0.12569		533	21	529	17	540	120	99
16_13	13		0.654	0.017	0.0808	0.0019	0.0588	0.0016	39000	22000	0.31085		510	11	500.9	11	544	59	98
16_14	13		0.674	0.024	0.0813	0.002	0.06	0.0021	131000	64000	0.22041		522	14	503.7	12	588	74	96
16_15	13		0.657	0.013	0.0847	0.0019	0.0561	0.0013	3100000	1600000	0.22224		512.5	8	524.1	12	448	51	102
16_16	13		0.643	0.015	0.0813	0.0019	0.0573	0.0012	310000	120000	0.51294		503.3	9.3	503.6	12	495	48	100
16_17	13		0.649	0.014	0.0825	0.0018	0.05728	0.0011	167000	69000	0.54232		507.1	8.2	510.8	11	508	40	101
16_18	13		0.664	0.015	0.0844	0.002	0.0573	0.0013	104000	37000	0.37393		516.3	9.3	522.3	12	489	51	101
16_19	13		0.802	0.036	0.0829	0.0028	0.07	0.0028	90000	34000	0.46047		597	20	513	17	912	83	86
16_20	13		0.685	0.021	0.0837	0.0021	0.0592	0.0018	109000	73000	0.29497		529	13	518.3	12	561	69	98
16_21	13		0.646	0.015	0.08266	0.0018	0.0566	0.0014	770000	380000	0.20736		505.5	9.1	511.9	11	466	54	101
16_22	13		0.657	0.016	0.0833	0.0021	0.0571	0.0014	201000	97000	0.45222		512.5	9.6	515.8	12	484	54	101
16_23	13		0.664	0.018	0.0817	0.0019	0.0588	0.0016	72000	31000	0.33841		516	11	506.1	11	548	57	98
16_24	13		0.761	0.032	0.0854	0.0021	0.0644	0.0028	26000	12000	0.1946		572	18	527.9	12	721	89	92
16_25	13		0.638	0.015	0.0815	0.0019	0.0568	0.0013	13200	3700	0.34409		500.6	9.3	505.2	11	479	49	101
16_26	13		0.684	0.038	0.0853	0.0024	0.058	0.0033	5100	2400	0.15212		527	23	528	14	490	120	100
16_27	13		0.659	0.024	0.0806	0.0021	0.0585	0.0021	4800	2700	0.13541		513	14	499.5	12	551	86	97
16_28	13		0.71	0.019	0.0852	0.0019	0.0603	0.0016	8800	3400	0.2952		544	11	527.1	12	612	63	97
16_29	13		0.69	0.031	0.0818	0.0022	0.0609	0.0027	8800	5300	0.22396		531	19	506.5	13	616	100	95
16_30	13		0.655	0.021	0.0833	0.0021	0.0568	0.0017	11500	6300	0.4133		511	13	515.5	13	470	67	101
16_31	13		0.663	0.027	0.0829	0.0021	0.0578	0.0025	6000	5100	0.060683		516	16	513.4	13	498	96	99
16_32	13		0.641	0.021	0.0818	0.0011	0.0576	0.0019	9800	6000	0.24063		502.3	13	507.1	6.8	500	74	101
16_33	13		0.665	0.023	0.0836	0.0015	0.0576	0.0018	35000	13000	0.56564		517	14	517.8	9.1	509	67	100
16_34	13		0.657	0.022	0.0834	0.0012	0.0579	0.0018	16600	5200	0.27186		512.4	13	516.4	6.9	523	66	101
16_35	13		0.631	0.023	0.0822	0.0012	0.0559	0.0019	15100	6400	0.29979		496	14	509.3	7.1	437	76	103
16_36	13		0.645	0.022	0.08394	0.00097	0.0565	0.0019	11200	4900	0.13215		504.7	14	519.5	5.8	456	74	103
16_37	13		0.661	0.022	0.08406	0.00096	0.0577	0.0018	10400	5100	0.15778		514.3	13	520.3	5.7	506	70	101
16_38	13		0.643	0.02	0.0815	0.0011	0.0576	0.0017	15500	7700	0.35973		503.5	12	504.9	6.3	507	65	100
16_39	13		0.686	0.034	0.0824	0.0018	0.0595	0.0026	12000	10000	0.52101		529	20	511	11	575	93	97
16_40	13		0.745	0.026	0.0864	0.0014	0.0623	0.0022	6100	5500	0.17612		565	15	534.1	8.5	673	78	95
